# Supplementary material for: Direct observation of surface charge and stiffness of human metaphase chromosomes
Source: Royal Society of Chemistry journal article supplement (doi:10.1039/d2na00620k), 2022-12-20
Supplement: d2na00620k1.pdf [file d2na00620k1.pdf]

## Supplementary Information

### a Enzyme-untreated chromosomes

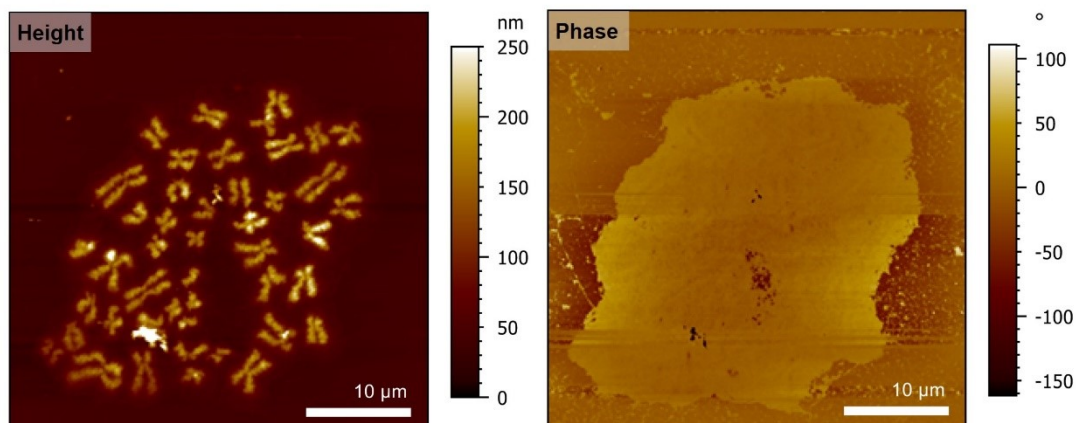

### b Enzyme-treated chromosomes

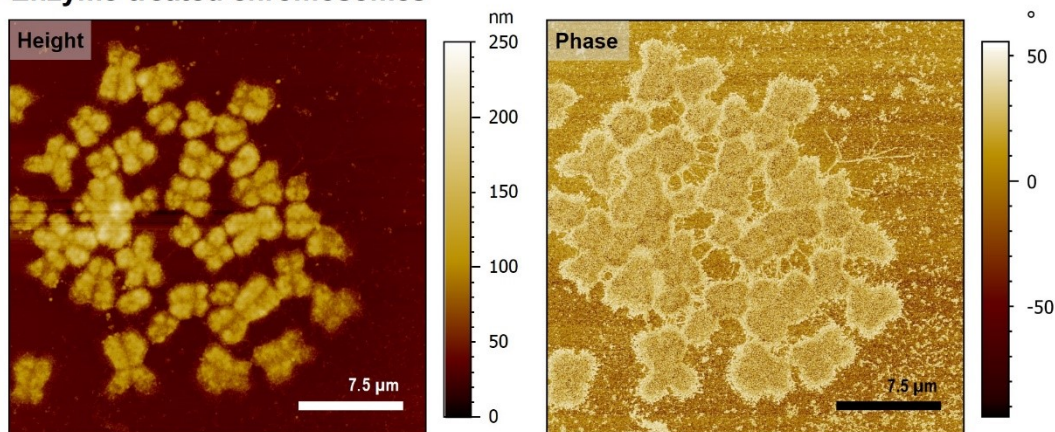

**Figure S1. AFM topological and phase images of enzyme-untreated and enzyme-treated chromosomes. a,** AFM topological (left) and phase (right) images of enzyme-untreated chromosomes. **b,** AFM topological (left) and phase (right) images of enzyme-treated chromosomes.

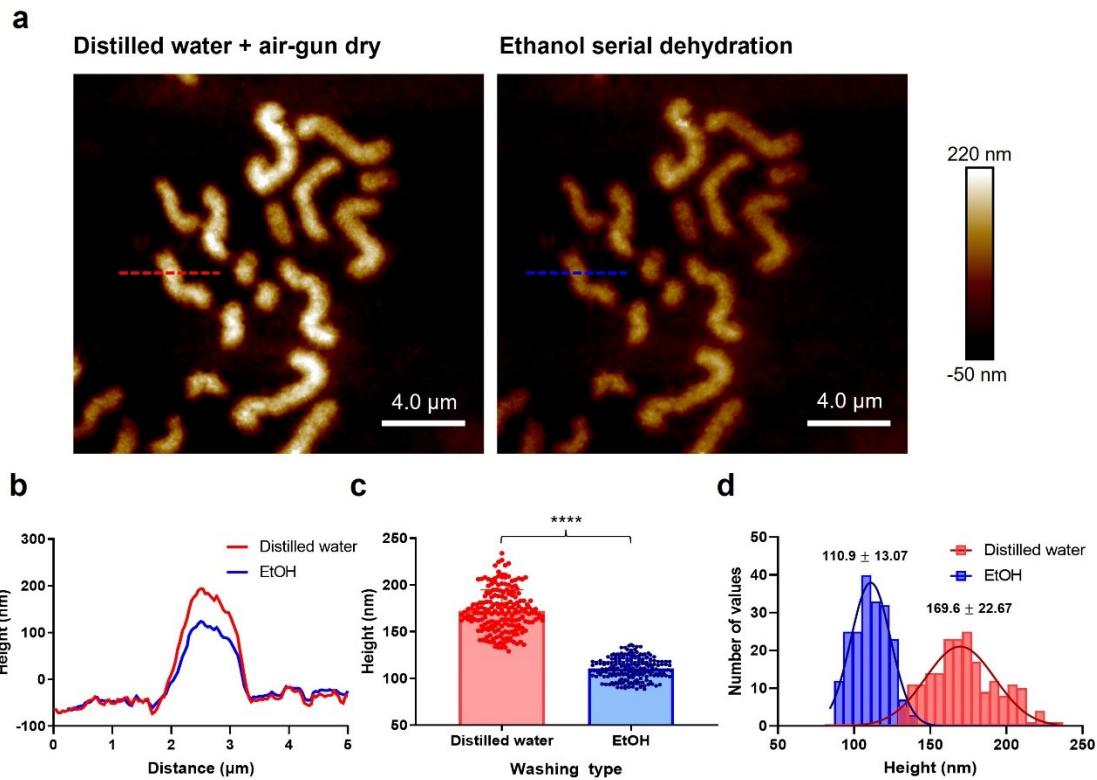

**Figure S2. Morphological changes of chromosomes according to EtOH.** **a**, AFM images of chromosome sets fabricated using the two methods. **b**, Cross-sectional profiles corresponding to the dashed lines in AFM images in **a**. **c**, **d**, Bar graph and distribution of histogram according to drying processing ( $n = 100$  per one group). \*\*\*\* $p < 0.0001$ . A two-tailed unpaired t-test was used for statistical analysis. The data were fitted to a Gaussian model, and the mean and standard deviation of best-fit values were calculated.

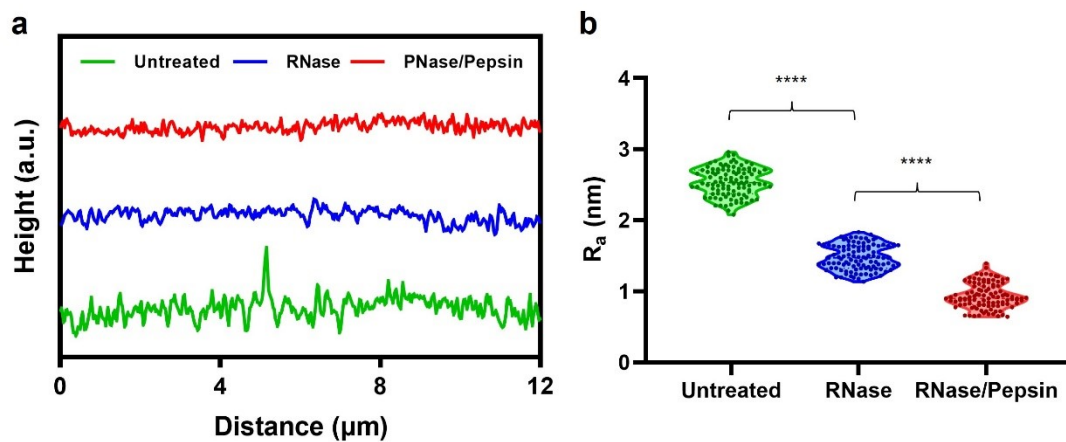

**Figure S3. Characterization of substrates near chromosome sample according to enzyme treatment.** **a**, Cross-sectional profiles of substrates according to enzyme treatment **b**, Violin plot of the average roughness of substrates according to enzyme treatment (n = 100 per one group). Roughness average analyses were performed using Gwyddion (version 2.60). \*\*\*\* $p < 0.0001$ . A two-tailed unpaired t-test was used for statistical analysis.

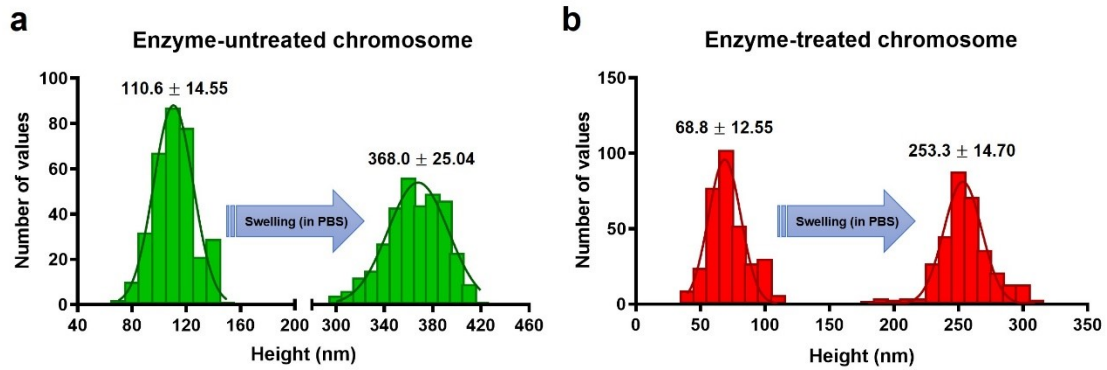

**Figure S4. Comparison of the heights between dehydrated and re-hydrated chromosomes.** **a**, Histogram shift of enzyme-untreated chromosomes according to swelling in PBS buffer. The original height was  $110.6 \pm 14.55$  nm, but after immersion in PBS for 30 minutes, it became  $368.0 \pm 25.04$  nm, an increase of approximately 3.3 times. **b**, Histogram shift of enzyme-treated chromosomes according to swelling in PBS buffer. The original height was  $68.8 \pm 12.55$  nm, but after immersion in PBS for 30 minutes, it became  $253.3 \pm 14.70$  nm, an increase of approximately 3.7 times. It implies that the covering effect of extra materials on chromosomal hydration is not marginal.

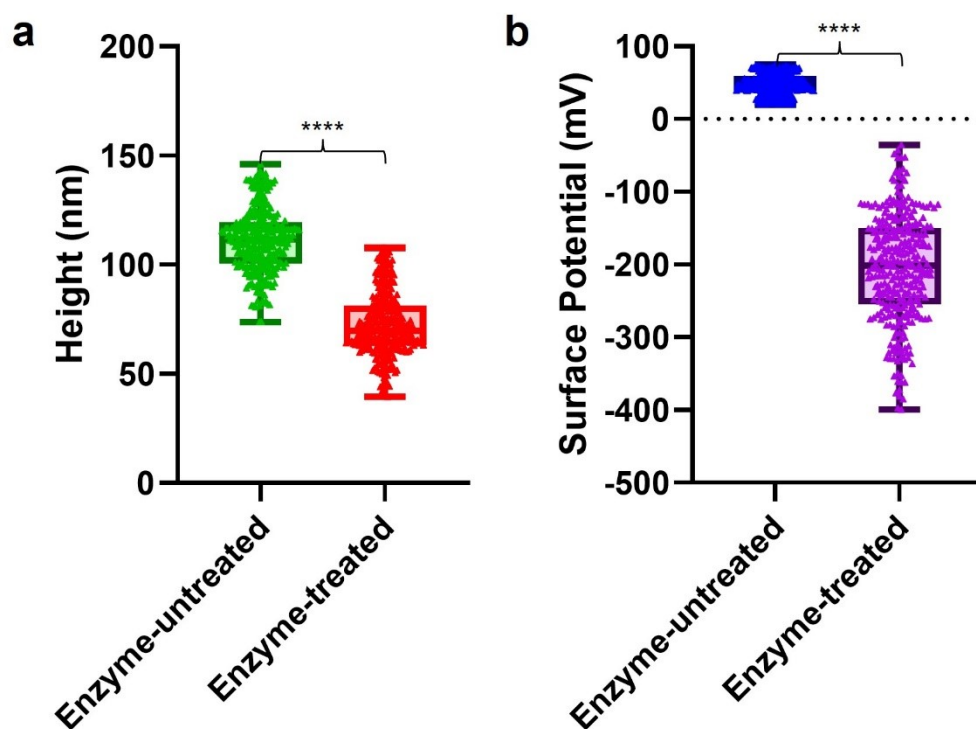

**Figure S5. Analysis of electrical properties for enzyme-untreated and enzyme-treated chromosomes.** **a**, Box plots of height and **b**, the surface potential for enzyme-untreated and enzyme-treated chromosomes ( $n > 300$  per one group). \*\*\*\* $p < 0.0001$ . A two-tailed unpaired t-test was used for statistical analysis.

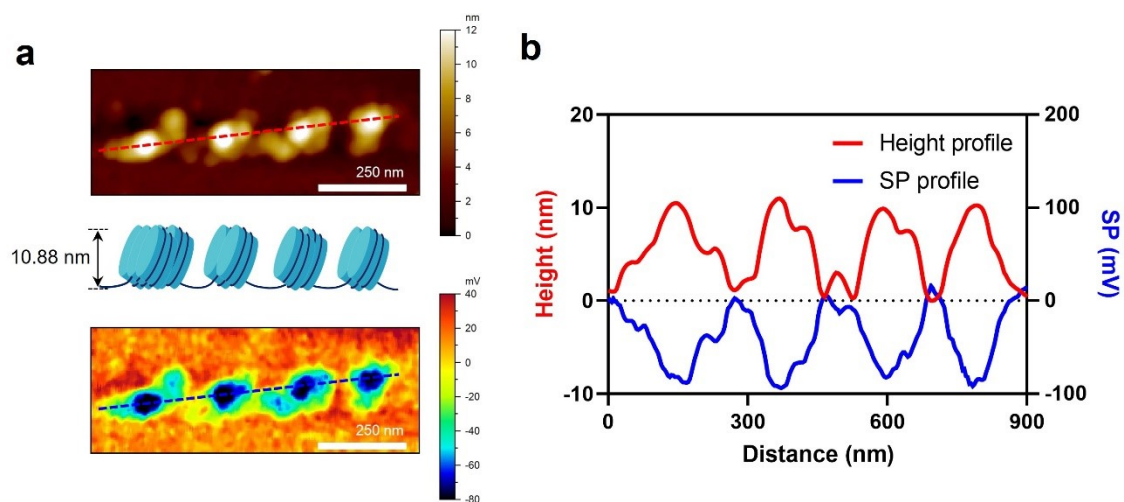

**Figure S6. Topography and surface potential characterization of nucleosomes. a,** AFM and KPFM map of nucleosomes. **b,** Cross-sectional profiles of height and surface potential corresponding to the dashed lines in AFM and KPFM images in **a**.

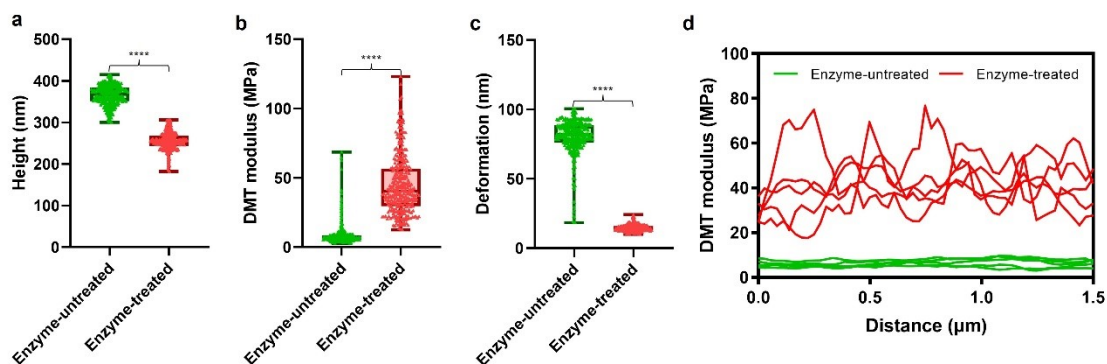

**Figure S7. Analysis of nanomechanical properties for enzyme-untreated and enzyme-treated chromosomes.** **a, b, c,** Box plots of height, surface potential, and deformation for enzyme-untreated and enzyme-treated chromosomes ( $n > 300$  per one group). \*\*\*\* $p < 0.0001$ . A two-tailed unpaired t-test was used for statistical analysis. These data are taken from Figure 3. **d,** Representative DMT modulus profiles of enzyme-untreated (green curves) and enzyme-treated chromosomes (red curves) from Figure 3b.



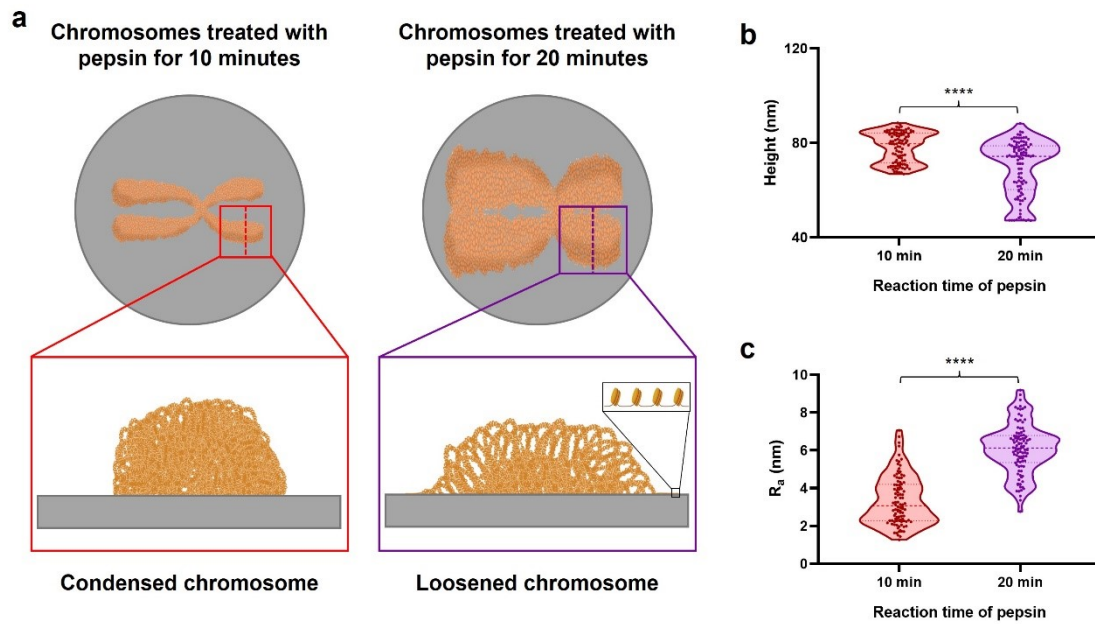

**Figure S8. Analysis of differences in height and roughness according to the pepsin exposure time.** **a**, Schematic illustration of properly pepsin-treated chromosomes (10 min) and excessive pepsin-treated chromosomes (20 min). **b**, **c**, Violin plots of height and average roughness of chromosomes according to pepsin reaction time (n=100 per one group). Average roughness analyses were performed using Gwyddion (version 2.60). \*\*\*\* $p < 0.0001$ . A two-tailed unpaired t-test was used for statistical analysis.



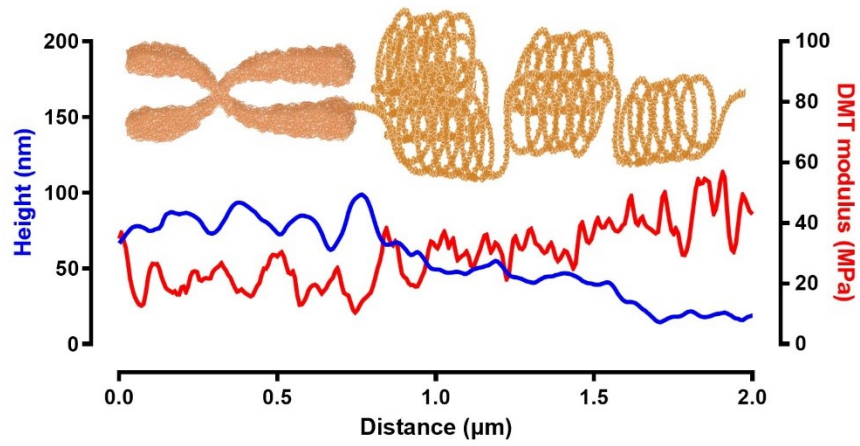

**Figure S9. Close-up of chromosome and chromatin fibers in Figure 4d.** Corss-sectional profiles of cross-section were obtained in Figure 4b, 4d. Each height and DMT modulus are inversely proportional. Each part of the scheme of chromosomal hierarchy corresponds to cross-sectional profiles according to distance.
